# Supplementary material for: Chemical upcycling of polybutadiene into size controlled α,ω-dienes and diesters via sequential hydrogenation and cross-metathesis
Source: Royal Society of Chemistry journal article supplement (doi:10.1039/d4sc06826b), 2025-01-01
Supplement: d4sc06826b1.pdf [file d4sc06826b1.pdf]

Electronic Supplementary information

**Chemical Upcycling of Polybutadiene into Size Controllable  $\alpha,\omega$ -Dienes and Diesters via Sequential Hydrogenation and Cross-Metathesis**

Christophe Vos,<sup>a</sup> Igor Beckers,<sup>a</sup> Galahad O'Rourke,<sup>a</sup> and Dirk De Vos<sup>a,\*</sup>

<sup>a</sup> Centre for Membrane Separations, Adsorption, Catalysis and Spectroscopy for Sustainable Solutions (cMACS), KU Leuven, Celestijnenlaan 200F, Post box 2454, 3001 Leuven, Belgium.

\* Corresponding author: [dirk.devos@kuleuven.be](mailto:dirk.devos@kuleuven.be)

## Table of Contents

### Experimental

1. Materials
2. Reaction conditions
3. Methods
  - Table S1.** N<sub>2</sub> pressure in the reactor and gross weight of the pressurized reactor.
  - Figure S1.** Mass versus N<sub>2</sub> pressure in the reactor with stirring bar and liner.
  - Figure S2.** Plot of the H<sub>2</sub> use calculated via the pressure drop versus the %C=C in the hPBD samples determined via <sup>1</sup>H NMR for all entries in Table 1.
4. Characterization

### Supporting data

1. Results heterogeneously catalyzed hydrogenation
  - Table S2.** Results of PBD hydrogenation with heterogeneous catalysts.
2. HMW PBD characterization
  - Table S3.** Characteristics as reported by the supplier of the used PBD.
  - Figure S3.** <sup>1</sup>H NMR spectrum of HMW PBD
3. Calculations hydrogenation and ethenolysis
  - Figure S4.** Entry 12, Table 1 after partial hydrogenation.
  - Table S4.** Summarized NMR data after partial hydrogenation of Entry 1 and 12 of Table 1.
  - Figure S5.** Entry 12, Table 1 after ethenolysis.
  - Table S5.** Summarized NMR data of Entry 1 and 12 after ethenolysis.
4. Chromatogram of products detected under optimal non-isomerizing conditions
  - Figure S6.** Chromatogram of Entry 12, Table 1.
5. Product distributions isomerized fraction after ethenolysis
  - Figure S7.** Product distributions of the isomerized fractions of entries 1-6 in Table 1.
6. Large scale hydrogenation and ethenolysis
  - Figure S8.** <sup>1</sup>H NMR spectrum of large scale hydrogenated HMW PBD with 11% C=C.
  - Figure S9.** <sup>1</sup>H NMR spectrum of large scale ethenolysis of hPBD with 11% C=C.
7. Mass recovery after hydrogenation
  - Table S6.** Mass recovery after hydrogenation of HMW PBD in CPME.
8. One pot reaction
  - Figure S10.** <sup>1</sup>H NMR spectrum after hydrogenation in the one pot hydrogenation-ethenolysis.
  - Figure S11.** <sup>1</sup>H NMR spectrum after ethenolysis in the one pot hydrogenation-ethenolysis.
9. Partial hydrogenation and ethenolysis of the rubber phase of high impact PS
  - Figure S12.** <sup>1</sup>H NMR spectra of the rubber phase of HIPS at the start, after partial hydrogenation and after ethenolysis.
  - Table S7.** <sup>1</sup>H NMR rubber phase HIPS peak area.
10. Cross metathesis
  - Figure S13.** GC Chromatograms of dummy mixture of C<sub>6</sub>, C<sub>8</sub>, C<sub>10</sub> and C<sub>12</sub> dienes (A), CM of 1,5-hexadiene and DMM (B), CM of 1,9-decadiene and DMM (C) and after CM of hPBD with DMM (D).
  - Table S8.** Shifts and J coupling values of methyl acrylate.
  - Figure S14.** <sup>1</sup>H NMR spectrum of CMM reaction of 1,5-hexadiene with DMM (A) and of 1,9-decadiene (B).

### References

# Experimental

## 1. Materials

High molecular weight cis-polybutadiene (PBD) with a molecular weight average ( $M_w$ ) of 200,000-300,000 g/mol, ethyl vinyl ether,  $\text{Ru}(\text{PPh}_3)_3\text{Cl}_2$ , the n-alkane standard mix  $\text{C}_7\text{-C}_{30}$  and the metathesis catalysts; (dichloro[1,3-bis(2,4,6-trimethylphenyl)-2-imidazolidinylidene](3-phenyl-1H-inden-1-ylidene)(tricyclohexylphosphine)ruthenium(II) as Grubbs Catalyst® M202, cis-[1,3-bis(2,4,6-trimethylphenyl)-2-imidazolidinylidene]dichloro(3-phenyl-1H-inden-1-ylidene)(triisopropylphosphite)ruthenium(II) as Grubbs Catalyst® M220) were acquired from Sigma-Aldrich. All employed solvents (cyclopentyl methyl ether (CPME), ethanol, tetrahydrofuran (THF), methanol and chloroform-d) were of technical grade without additional purification or drying. 1,4-Benzoquinone (BQ) and 1,9-decadiene were supplied by TCI Belgium. n-Nonane, 1,5-hexadiene, 5wt% palladium on  $\text{Al}_2\text{O}_3$  and dimethyl maleate (DMM) were supplied by Acros. The 66wt% nickel on silica-alumina was supplied by Thermo Fisher Scientific. 5 wt% nickel on  $\text{Al}_2\text{O}_3$  and 5wt% nickel on  $\text{SiO}_2$  were prepared as described by Cuypers *et al.*<sup>1</sup> The rubber phase of a commercial HIPS sample was obtained as described by Giakoumakis *et al.*<sup>2</sup> Small scale reactions under pressurised gas atmosphere ( $\text{H}_2$  or ethylene) were performed in 15 mL home-made autoclave reactors equipped with digital manometers, that can withstand pressures up to 60 bar. The pressure was monitored using an IFM PT 5423 pressure transmitter mounted on the reactor with a measuring range of 0-60 bar in combination with a Dixell xt controller display. Large scale hydrogenation was performed in a 600 mL Parr reactor. Large scale ethenolysis was performed in a 60 mL Premex reactor.

## 2. Reaction conditions

### 2.1 Hydrogenation

For the small scale hydrogenation, a stock solution of 1 M PBD (based on a butadiene repeat unit of 54 g/mol) was prepared in a vial by dissolving PBD (16 mmol, 864 mg PBD) in THF (15 mL) to a total volume of 16 mL at 50°C. Before reaction, the described quantity of  $\text{Ru}(\text{PPh}_3)_3\text{Cl}_2$  catalyst or heterogeneous catalyst and 2 mL of the PBD stock solution (2 mmol PBD, 1 M, 2 mL) were brought into a liner. The liner was inserted into an autoclave reactor which was then sealed. After flushing with  $\text{N}_2$ , the autoclave was brought under the investigated  $\text{H}_2$  pressure. For homogeneous hydrogenation reactions under high pressure (30 bar  $\text{H}_2$ ) and at low temperature (40°C), 2.4 mg of  $\text{Ru}(\text{PPh}_3)_3\text{Cl}_2$  (0.0025 mmol, 0.125 mol% vs PBD unit) was used. For reactions under low pressure (8 bar  $\text{H}_2$ ) at high temperature (80°C), 4.8 mg  $\text{Ru}(\text{PPh}_3)_3\text{Cl}_2$  (0.005 mmol, 0.25 mol% per PBD unit) was used. The reaction mixture was then heated and magnetically stirred until a given pressure was reached. Thereafter, the autoclave was cooled in an ice-bath and THF (2 mL) was added to the reaction mixture. Subsequently, the reaction mixture was added to an excess of ethanol (~6 mL) as anti-solvent to precipitate the partially hydrogenated PBD. This polymer product was then isolated by decantation of the solvent excess whereafter it was dried under reduced pressure.

For the large scale hydrogenation in a 600 mL Parr reactor, a stock solution of 1.2 M PBD (based on a butadiene repeat unit of 54 g/mol) was prepared in a volumetric flask of 250 mL by dissolving PBD (300 mmol, 16.2 g PBD) in CPME (232 mL) to a total volume of 250 mL at 50°C. The mixture was brought in the glass liner of the Parr reactor together with 360 mg of  $\text{Ru}(\text{PPh}_3)_3\text{Cl}_2$  (0.375 mmol, 0.125 mol% vs the butadiene unit). The reactor was closed and the 350 mL headspace was flushed with  $\text{N}_2$  and loaded with 14.5 bar  $\text{H}_2$ . The reactor was heated to 100°C and stirred at 500 rpm for 5h. The partially hydrogenated PBD was precipitated in 500 mL of MeOH as anti-solvent, spread out on a crystallization dish and dried overnight in a vacuum oven at 80°C.

The hydrogenation of the HIPS rubber phase (37.5 wt% PBD)<sup>2</sup> was performed in the home-made 15 mL autoclave. 72 mg (0.5 mmol C=C) was finely dispersed in 2 mL THF at 60°C. 4.8 mg  $\text{Ru}(\text{PPh}_3)_3\text{Cl}_2$  (0.005 mmol, 1 mol% vs C=C) was brought in a glass liner together with the dispersion and placed in the autoclave. The reactor was sealed and the headspace was flushed with  $\text{N}_2$  and afterwards charged to 12 bar  $\text{H}_2$ . The autoclave was heated to 80°C for 2h. After the reaction, the product was precipitated in 5 mL of methanol, separated via decantation and dried under reduced pressure.

The polymer products were analysed by liquid  $^1\text{H}$  NMR analysis ( $\text{CDCl}_3$ , 400 MHz) at room temperature.

## 2.2 Metathesis reactions: Ethenolysis and Cross-metathesis

The ethenolysis of *trans*-5-decene (100  $\mu\text{mol}$ , 18.9  $\mu\text{L}$ , 1eq.) was performed in CPME (1 mL) with Grubbs Catalyst<sup>®</sup> M202 (0.01 eq., 0.95 mg) or Grubbs Catalyst<sup>®</sup> M220 (0.01 eq., 0.87 mg) for 1-4 hours. In some reactions, benzoquinone (0.185 eq., 2 mg) was added. Small scale ethenolysis of hPBD (100  $\mu\text{mol}$  double bonds, 1 eq.) was performed in  $\text{CDCl}_3$  (1 mL) with Grubbs Catalyst<sup>®</sup> M220 (0.01 eq., 0.87 mg) and benzoquinone (0.185 eq., 2 mg) for 1h. Large scale ethenolysis of hPBD (1.5 g, 12 mmol double bonds, 1 eq.) was performed in  $\text{CDCl}_3$  (30 mL) in a 60 mL Premex reactor using Grubbs Catalyst<sup>®</sup> M202 (0.057 eq., 65 mg). After stirring the mixture overnight, undissolved particles were finely grounded using a mortar and pestle; this step is necessary to ensure complete dissolution during the large scale ethenolysis. Ethenolysis of partially hydrogenated rubber from HIPS (30 mg) was performed in  $\text{CDCl}_3$  (1 mL) using 1 mg Grubbs Catalyst<sup>®</sup> M220 and 2 mg BQ for 1h at 100°C. Cross-metathesis of 1,5-hexadiene (0.5 mmol, 60  $\mu\text{L}$ , 1eq.) and 1,9-decadiene (0.5 mmol, 92  $\mu\text{L}$ , 1 eq.) with dimethyl maleate (DMM) (2.5 mmol, 313  $\mu\text{L}$ , 5 eq.) as cross-coupling partner was performed in  $\text{CDCl}_3$  (1 mL) with a reaction time of 4h using Grubbs Catalyst<sup>®</sup> M202 (0.01 eq., 4.75 mg) at 80°C. Cross-metathesis of the hPBD (100  $\mu\text{mol}$  double bonds, 1 eq.) with dimethyl maleate (DMM) (0.5 mmol, 62  $\mu\text{L}$ , 5 eq.) as cross-coupling partner was performed in  $\text{CDCl}_3$  (1 mL) with a reaction time of 4h at 80°C using Grubbs M202 (0.01 eq., 0.95 mg). Solutions were brought in a glass liner loaded with benzoquinone and/or the catalyst. After sealing the reactor, the headspace was purged with  $\text{N}_2$  and loaded with 8 bar  $\text{C}_2\text{H}_4$  for all ethenolysis reactions. For the large scale reaction in the Premex reactor, the pressure was left to stabilize under magnetic stirring. The reactors were put in a preheated block and magnetically stirred at 400 rpm. After heating the reaction mixture for the designated reaction time, the reactors were cooled in a water bath. Subsequently, an aliquot (200  $\mu\text{L}$ ) of the reaction mixture was transferred to a vial for GC analysis. Additionally, *n*-nonane (100  $\mu\text{mol}$ , 17.85  $\mu\text{L}$ ), as the external standard, and ethyl vinyl ether (25  $\mu\text{L}$ ), to quench the catalyst, were added prior to GC analysis.

## 2.3 One pot hydrogenation-ethenolysis

Hydrogenation of the PBD was performed under the high pressure, low temperature conditions described above, but with  $\text{CDCl}_3$  as the solvent and a reaction time of 9h. After hydrogenation, 100  $\mu\text{L}$  of the solution was mixed with 400  $\mu\text{L}$   $\text{CDCl}_3$  for  $^1\text{H}$  NMR analysis. For the ethenolysis reaction, 120 $\mu\text{L}$  of the solution (100  $\mu\text{mol}$  C=C, 1 eq.) was mixed with 880  $\mu\text{L}$  of  $\text{CDCl}_3$  and transferred to a liner with benzoquinone (0.185 eq., 2 mg) and Grubbs Catalyst<sup>®</sup> M220 (0.01 eq., 0.87 mg). The reactor was closed, purged with  $\text{N}_2$  and loaded with 8 bar  $\text{C}_2\text{H}_4$ . A reaction time of 1h at 100°C was used.

## 3. Methods

### 3.1 Calculation of hydrogen consumption

#### Measuring the headspace volume in the reactor

The home-made autoclave reactors with an empty volume of 15 mL were frequently tested for leaks at 60 bar  $\text{H}_2$  using a flammable gas detector.  $\text{H}_2$  and  $\text{N}_2$  were assumed to behave like ideal gases.

The volume of the reactor with its internal components (i.e. with glass liner and stirring bar, but without the polymer solution) was measured according to the ideal gas law:

$$V = \frac{nRT}{P}$$

Here,  $n/P$  was obtained from  $m/P$  by weighing the reactor with its internal components at different pressures of  $\text{N}_2$ , plotting the pressure versus the mass (see **Table S1** and **Figure S1**), calculating the slope ( $m/P$ ) and using the molar mass of  $\text{N}_2$  to finally calculate  $n/P$ .

**Table S1.**  $N_2$  pressure in the reactor and gross weight of the pressurized reactor.

| Pressure (bar) | Mass (g) |
|----------------|----------|
| 29.0           | 461.25   |
| 24.0           | 461.19   |
| 20.0           | 461.14   |
| 14.0           | 461.06   |
| 10.0           | 461.01   |
| 4.0            | 460.96   |
| 0.0            | 460.92   |

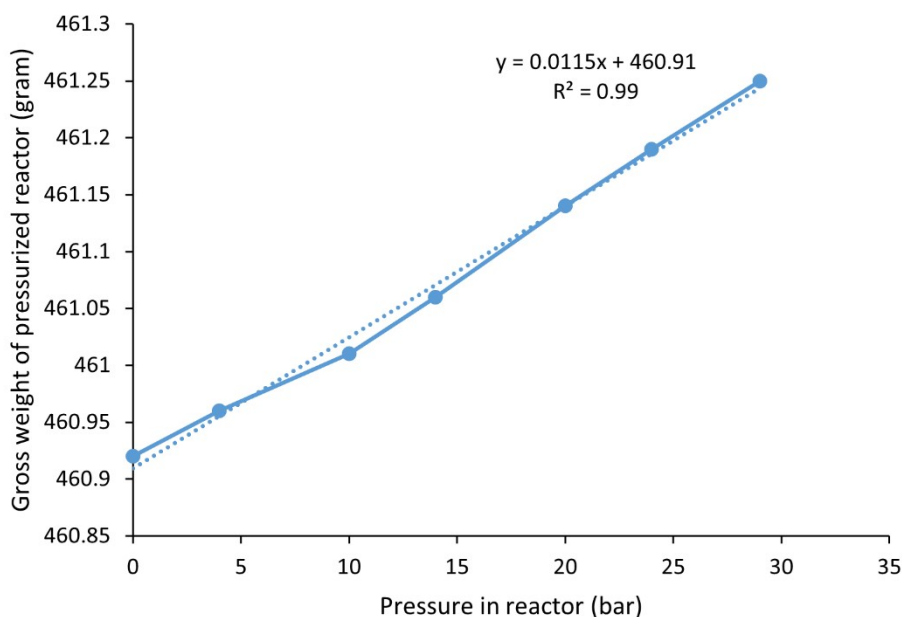

**Figure S1.** Plot of the  $N_2$  pressure versus gross weight of the pressurized reactor.

From the  $N_2$  pressure versus the weight of the reactor plot, the slope (m/P) was calculated to be 11.5 mg/bar. Using the molar weight of  $N_2$  (28 mg/mmol), n/P is 0.411 mmol/bar or  $0.411 \times 10^{-8}$  mol/Pa.

With temperature T as 298K and the ideal gas constant R as  $8.314 \frac{J}{mol \times K}$ , the volume was calculated to be **10.2 mL**.

#### Estimation of hydrogen consumption during hydrogenations:

Upon volumetric addition of 2 mL of the 1M PBD solution (25 C=C/100C, 2 mmol C=C) to the reactor, the head space gas volume reduced to 8.2 mL. The reactor was then charged with the indicated  $H_2$ -pressure (8 bar or 30 bar). To start the reaction, the reactor was placed in a heated block with magnetic stirring. After an initial pressure change in the first 5 minutes due to the heating of the reactor contents and dissolution of the  $H_2$ , the pressure stabilized and this stabilized pressure was taken as the initial starting pressure.

According to the ideal gas law, it was calculated that **0.1 mmol  $H_2$**  in a volume of 8.2 mL at **40°C corresponds to 0.31 bar**, while at **80°C 0.1 mmol  $H_2$  corresponds to 0.36 bar**. The pressure inside of the reactor was monitored during the course of the reaction and when the pressure dropped to a given value, the reaction was stopped by cooling the reactor in a water bath and releasing the remaining hydrogen gas. For entries 1 and 12 in **Table 1**, the hydrogen consumption was estimated by comparing the theoretically used  $H_2$  based on  $^1H$  NMR with the amount used according to the pressure drop monitoring.

For Entry 1, partial hydrogenation was performed at 80°C under 8 bar  $H_2$ . According to the  $^1H$  NMR, there are 20.8 %C=C left in the hPBD sample. This indicates that  $20.8/25 = 83.2\%$  of the initial double bonds (C=C) are left

and that 16.8% of the C=C has been converted into single C-C, which corresponds to a **theoretical H<sub>2</sub> use** of 16.8%\*2 mmol = **0.34 mmol H<sub>2</sub>**.

For Entry 1, the reactor was charged to 8 bar of H<sub>2</sub>. After 5 minutes of heating up to 80°C and simultaneous dissolution of the hydrogen, the pressure increased to 9.10 bar which was taken as the reference pressure. The reaction was stopped after 40 minutes when the display indicated 8.34 bar. This corresponds to a pressure difference of 9.10 - 8.34 = 0.55 bar, which corresponds to a **measured use of 0.15 mmol H<sub>2</sub>** using the ideal gas law (see previous section):

$$\frac{0.55 \text{ bar}}{\frac{0.36 \text{ bar}}{0.1 \text{ mmol}}} = 0.15 \text{ mmol H}_2$$

For Entry 12 in **Table 1**, hydrogenation was performed at 40°C under 30 bar H<sub>2</sub>. The same calculation as above gives a **theoretical use of 1.14 mmol H<sub>2</sub>**. The initial pressure for this example was 30.5 bar. After 6h, the pressure dropped to 27.3 bar. Here the pressure difference is 30.5-27.3 = 3.2 bar which corresponds to a **measured use of 1.03 mmol H<sub>2</sub>**:

$$\frac{3.20 \text{ bar}}{\frac{0.31 \text{ bar}}{0.1 \text{ mmol}}} = 1.03 \text{ mmol H}_2$$

For entries 1-6 (Low P, high T) and entries 7-13 (High P, Low T) in **Table 1**, the %C=C in the hPBD samples measured via <sup>1</sup>H NMR is plotted versus the measured use of H<sub>2</sub> via the pressure drop (**Figure S2**). In the plot, also the theoretical H<sub>2</sub> use for a certain hydrogenation degree of the hPBD is plotted. For the case of Low P & high T, there is quite a difference between the theoretical use and the measured use via the pressure drop, although the linear trendline has a R<sup>2</sup> of 0.97. However for the High P & Low T case, a good agreement between the measured data and the theoretical values is seen and the trendline has a R<sup>2</sup> of 0.98. While the pressure drop method does not fully match the theoretical H<sub>2</sub>, it can be used as an experimental indication to estimate the %C=C in the hPBD samples.

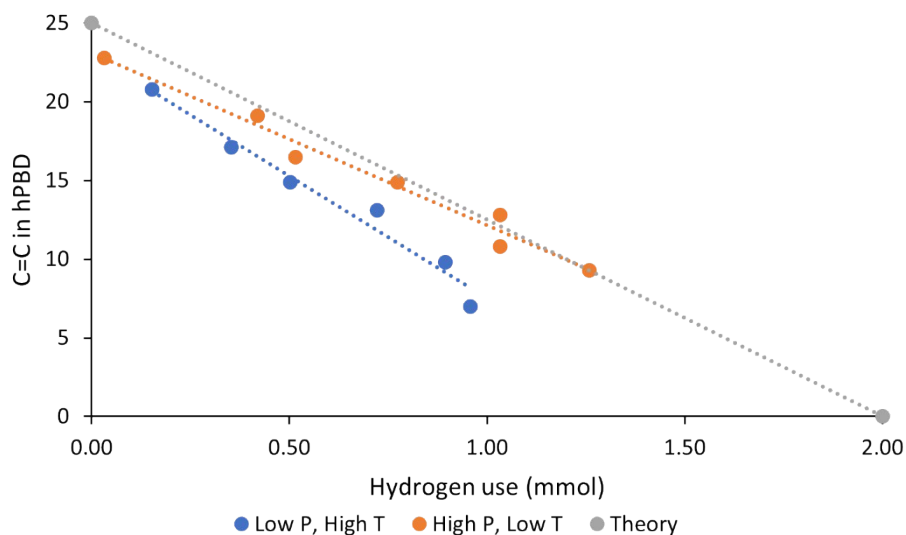

**Figure S2.** Plot of the H<sub>2</sub> use calculated via the pressure drop versus the %C=C in the hPBD samples determined via <sup>1</sup>H NMR for all entries in Table 1. The theoretical use indicates the case in which the use calculated via the pressure drop would be equal to the use calculated via <sup>1</sup>H NMR.

## 4. Characterization

### 4.1 GC analysis

GC analysis was performed on a Shimadzu GC-2010 Pro equipped with a CP Sil-5 CB column and an FID detector. 1  $\mu$ L sample was injected via a AOC-20i autosampler with a split ratio of 30. The N<sub>2</sub> carrier gas had a total flow of 76.6 mL/min. The temperature vs time profile was as follows: 8 min holding time at 35°C, ramp to 120°C with a rate of 7°C/min, a ramp to 280°C with a rate of 20°C/min, and lastly a holding time of 10 min at 280°C.

### 4.2 GCMS analysis

The GC 6890N was equipped with a HP-1MS ultra inert column. 1  $\mu$ L sample was injected with a split ratio of 30. The He carrier gas had a total flow of 1 mL/min. The temperature vs time profile was as follows: 4 min holding time at 40°C, ramp to 100°C with a rate of 5°C/min and a holding time of 2 min, a ramp to 280°C with a rate of 20°C/min and lastly a holding time of 5 min. The Agilent 5973N MSD was equipped with an electron impact ion source and a single quadrupole mass filter. A GC analysis was combined with a GCMS analysis to identify the compounds. The retention times of the C<sub>7</sub>-C<sub>30</sub> n-alkanes in a standard mix were compared with the obtained retention times of the dienes to determine the chain lengths of products of C<sub>15</sub> or higher.

### 4.3 <sup>1</sup>H NMR analysis

High-field nuclear magnetic resonance (NMR) spectra were recorded on a Bruker Avance III HD 400 spectrometer with a Bruker Ascend™ 400 magnet system (<sup>1</sup>H basic frequency of 400.17 MHz) and a 5 mm PABBO BB/19F-1H/D probe with z-gradients. All samples were dissolved in chloroform-d (CDCl<sub>3</sub>). Data were recorded at room temperature using Bruker TopSpin 3.6.5 and processed and analyzed using Mestrenova 12.0.2. <sup>1</sup>H data were calibrated using tetramethylsilane (TMS) as an internal calibration reference.

## Supporting data

### 1. Results heterogeneously catalyzed hydrogenation

**Table S2.** Results of PBD hydrogenation with heterogeneous catalysts. Conditions: 2 mL of a 1M PBD solution in THF, 4h, 80°C, 8 bar H<sub>2</sub>.

| Heterogeneous catalyst                                     | Metal loading (mol%) | Degree of unsaturation in %C=C |
|------------------------------------------------------------|----------------------|--------------------------------|
| 5 wt% Pd/Al <sub>2</sub> O <sub>3</sub>                    | 0.125                | 24                             |
| 5 wt% Ni/SiO <sub>2</sub>                                  | 0.125                | 25                             |
| 5 wt% Ni/Al <sub>2</sub> O <sub>3</sub>                    | 0.125                | 25                             |
| 66 wt% Ni/SiO <sub>2</sub> -Al <sub>2</sub> O <sub>3</sub> | 0.800                | 25                             |



## 2. HMW PBD characterization

The characteristics from the supplier (Sigma Aldrich)<sup>3</sup> are given in **Table S3**.

**Table S3.** Characteristics of the used PBD as reported by the supplier.

| Characteristic         | Reported by supplier          |
|------------------------|-------------------------------|
| Physical state         | Rubber like solid             |
| Density (25°C)         | 0.9 g/mL (lit.)               |
| Weight                 | Average $M_w$ 200,000-300,000 |
| Viscosity              | 40, Mooney (lit.)             |
| Glass transition $T_g$ | -102°C                        |
| %Cis                   | 98%                           |

The  $^1\text{H}$  spectrum ( $\text{CDCl}_3$ , 400 MHz) of the PBD is displayed **Figure S3**. Two regions can be distinguished: protons associated with C=C double bonds can be found around 5.80 – 4.80 ppm, while protons associated with C-C single bonds are in the region of 2.40 – 0.70 ppm.<sup>4</sup> Protons  $H_a$  (5.50 – 5.25 ppm) are connected to internally double bonded C-atoms from *cis*-1,4 and *trans*-1,4 units. 1,2-vinyl groups have 2 types of protons bonded to C=C bonds. The signal around 5.80 – 5.50 ppm corresponds to the methine protons  $H_b$  while the methylenic protons  $H_c$  have signals around 5.25 – 4.80 ppm. Allylic protons  $H_e$  in the chain between *cis*-1,4 and *trans*-1,4 units have signals at 2.40 – 1.8 ppm. Protons in the region 1.55 – 1.2 ppm are protons of the methylenic groups  $H_d$  from joint 1,2-vinyl groups or intrablock 1,2-units. Finally, the alkyl end groups ( $-\text{CH}_3$ ) can be found around 1 – 0.70 ppm. The vinyl content ( $v$ ) was calculated based on the following formula<sup>4</sup>

$$v = \frac{I_2}{I_1 + 0.5I_2}$$

with  $I_1$  the sum of integrated intensities ( $H_a + H_b$ ) and  $I_2$  the integrated intensity  $H_c$ .

For the PBD,  $I_1 = 43$  and  $I_2 = 1$  so a vinyl content  $v = \frac{1,0}{43,0 + 0,5} = 2.3\%$  was obtained, which is in agreement with the value reported by the supplier.

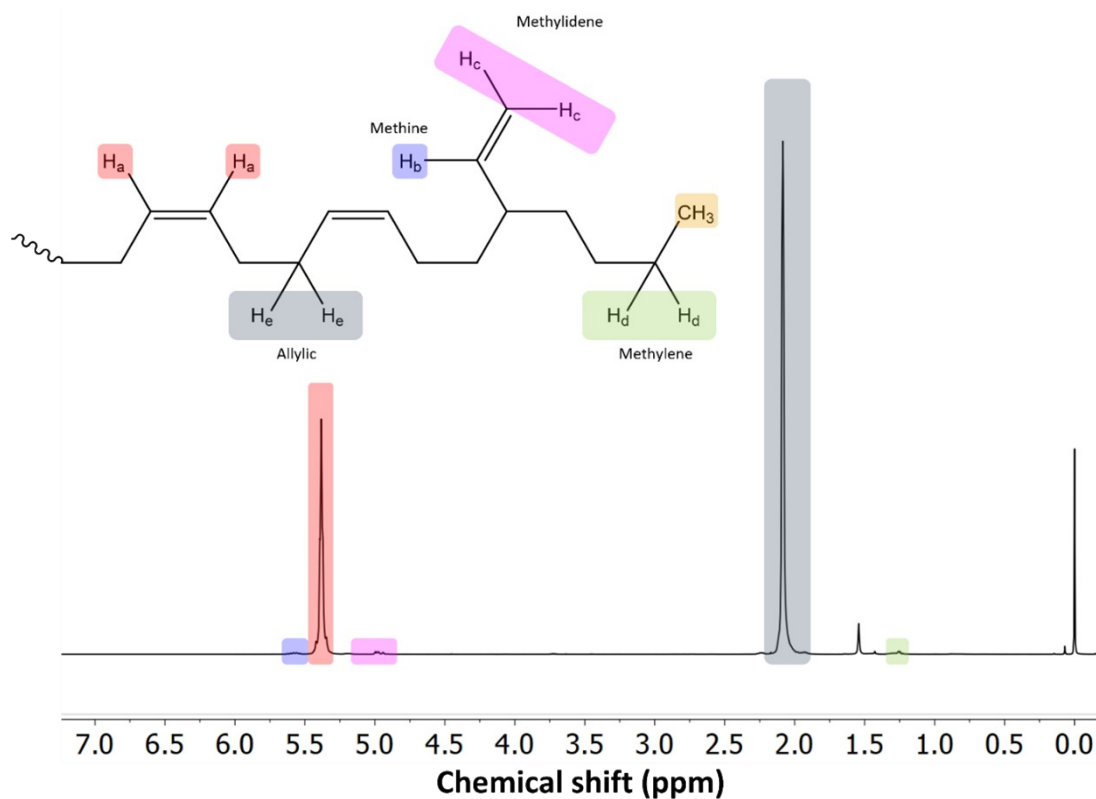

**Figure S3.**  $^1\text{H}$  NMR spectrum of HMW PBD

### 3. Calculations hydrogenation and ethenolysis

To show how the data in **Table 1** on %C=C, conversion C=C after ethenolysis and %vinyl groups were calculated, step by step calculations are included for Entry 1 (representative for low P and high T hydrogenation) and Entry 12 (representative for high P and low T hydrogenation) of **Table 1**. For Entry 12, also the  $^1\text{H}$  NMR spectra after partial hydrogenation (**Figure S4**) and ethenolysis (**Figure S5**) are included. In **Table S4**, NMR data after the partial hydrogenation of both samples are summarized and the NMR data after ethenolysis can be found in **Table S5**.

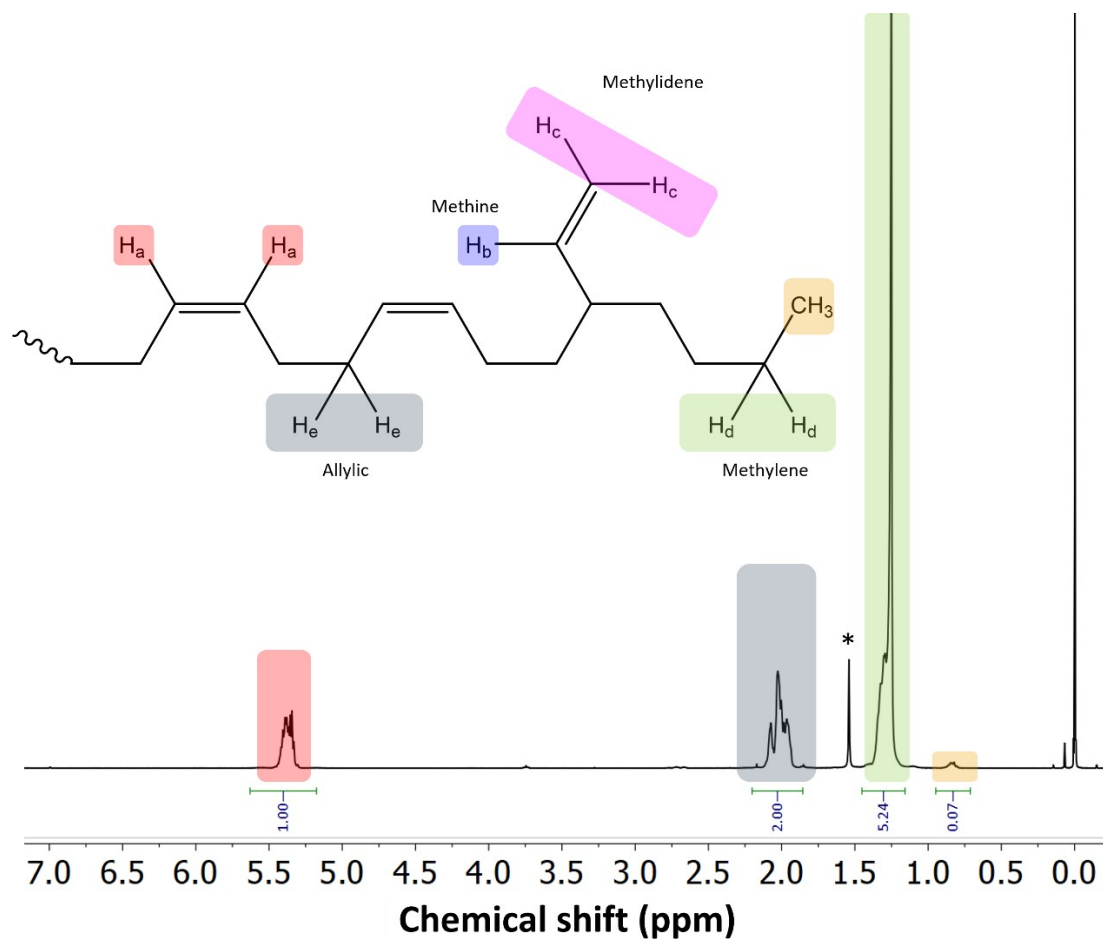

**Figure S4.** Entry 12, Table 1 after partial hydrogenation. \*H<sub>2</sub>O. Conditions: 2 mmol PBD in 2 mL THF, 0.125 mol% Ru(PPh<sub>3</sub>)<sub>3</sub>Cl<sub>2</sub>, 40°C, 30 bar H<sub>2</sub>.

**Table S4.** Summarized NMR data after partial hydrogenation of Entry 1 and 12 of Table 1.

**Entry 1: Low P, high T**

| Proton          | Shift (ppm) | #H per C | Signal NMR | Signal NMR/#H | % Signal     |
|-----------------|-------------|----------|------------|---------------|--------------|
| H <sub>a</sub>  | 5.25-5.5    | 1        | 1.00       | 1.00          | <b>41.67</b> |
| H <sub>e</sub>  | 1.80-2.40   | 2        | 1.88       | 0.94          | 39.17        |
| H <sub>d</sub>  | 1.2-1.55    | 2        | 0.90       | 0.45          | 18.75        |
| CH <sub>3</sub> | 0.77-1      | 3        | 0.03       | 0.01          | 0.42         |

| <b>Total</b>                   |             |          | 3.81       | 2.4           | 100.0        |
|--------------------------------|-------------|----------|------------|---------------|--------------|
| <b>Entry 12: High P, low T</b> |             |          |            |               |              |
| Proton                         | Shift (ppm) | #H per C | Signal NMR | Signal NMR/#H | % Signal     |
| H <sub>a</sub>                 | 5.25-5.5    | 1        | 1.00       | 1.00          | <b>21.54</b> |
| H <sub>e</sub>                 | 1.80-2.40   | 2        | 2.00       | 1.00          | 21.54        |
| H <sub>d</sub>                 | 1.2-1.55    | 2        | 5.24       | 2.62          | 56.42        |
| CH <sub>3</sub>                | 0.77-1      | 3        | 0.07       | 0.02          | 0.50         |
| <b>Total</b>                   |             |          | 8,31       | 4.64          | 100.0        |

To calculate the amount of C=C per 100C, all the signals were divided by their number of H-atoms per C-atom (Signal NMR/#H). From these values and their sum, the relative amount of the different C-atoms was calculated (% Signal). For Entry 1, the C-H<sub>a</sub> signal was 41.67 % of the total integrated area, while for Entry 12, it was 21.54 %. To calculate the %C=C, these values need to be divided by 2 because 2 of these carbon atoms correspond to 1 double bond. This is then 41.67/2 = 20.83 or **20.8 %C=C** for Entry 1 and 21.54/2 = 10.77 or **10.8% C=C** for Entry 12.

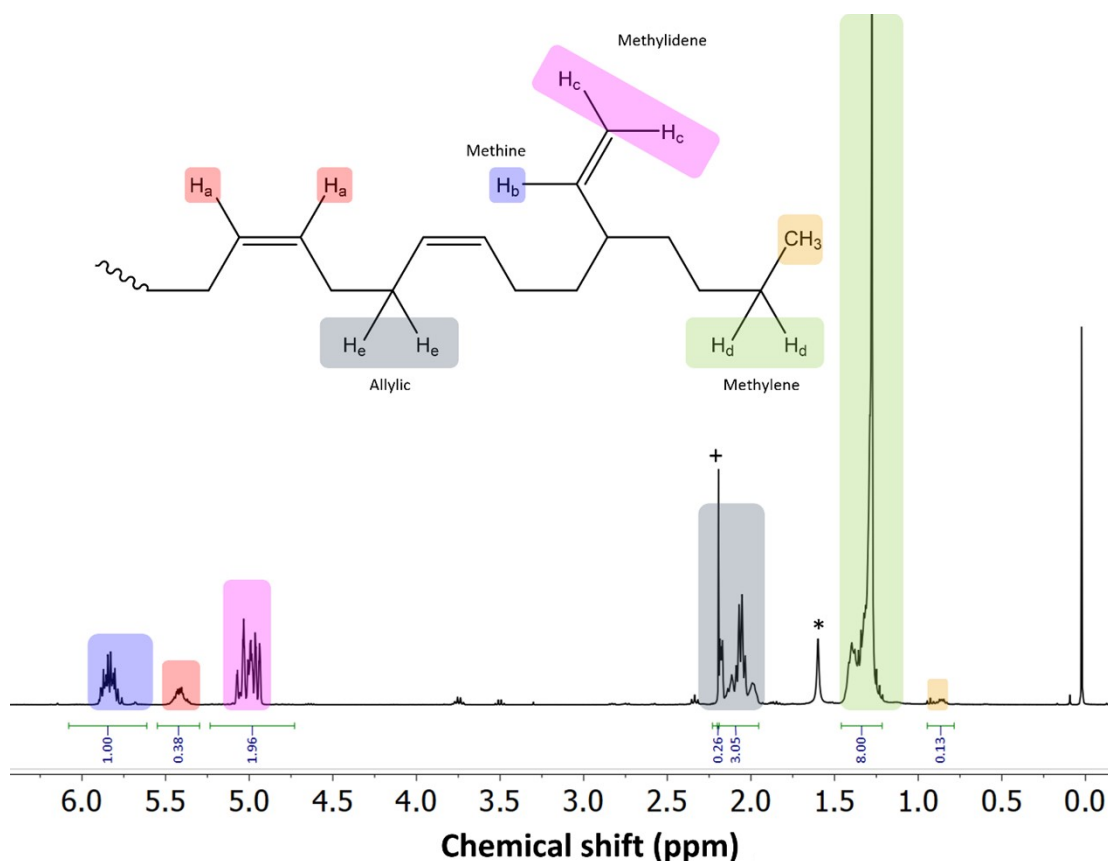

**Figure S5.** Entry 12, Table 2 after ethenolysis. \*H<sub>2</sub>O, \*acetone (surface = 0.26). Protons H<sub>e</sub> were corrected for the acetone peak overlap. Conditions: 0.1 mmol hPBD in 1 mL CDCl<sub>3</sub>, 1 mol% Grubbs M220 catalyst, 2 mg BQ, 1h at 100°C, 8 bar C<sub>2</sub>H<sub>4</sub>.

**Table S5.** Summarized NMR data of Entry 1 and 12 after ethenolysis.

| <b>Entry 1</b> |             |            |            |               |              |
|----------------|-------------|------------|------------|---------------|--------------|
| Proton         | Shift (ppm) | #H per C=C | Signal NMR | Signal NMR/#H | % Signal     |
| H <sub>b</sub> | 5.5-5.8     | 1          | 1.00       | 1.00          | <b>25.83</b> |
| H <sub>a</sub> | 5.25-5.5    | 1          | 0.13       | 0.13          | <b>3.36</b>  |

|                 |          |   |      |      |       |
|-----------------|----------|---|------|------|-------|
| H <sub>c</sub>  | 4.8-5.25 | 2 | 1.86 | 0.93 | 24.02 |
| H <sub>e</sub>  | 1.8-2.4  | 2 | 2.20 | 1.10 | 28.41 |
| H <sub>d</sub>  | 1.2-1.55 | 2 | 1.39 | 0.70 | 17.95 |
| CH <sub>3</sub> | 0.7-1    | 3 | 0.05 | 0.02 | 0.43  |
| <b>Total</b>    |          |   | 6.63 | 3.87 | 100.0 |

#### Entry 12

| Proton          | Shift (ppm) | #H per C=C | Signal NMR | Signal NMR/#H | % Signal     |
|-----------------|-------------|------------|------------|---------------|--------------|
| H <sub>b</sub>  | 5.5-5.8     | 1          | 1.00       | 1.00          | <b>12.82</b> |
| H <sub>a</sub>  | 5.25-5.5    | 1          | 0.38       | 0.38          | <b>4.87</b>  |
| H <sub>c</sub>  | 4.8-5.25    | 2          | 1.96       | 0.98          | 12.56        |
| H <sub>e</sub>  | 1.8-2.4     | 2          | 2.80       | 1.40          | 17.94        |
| H <sub>d</sub>  | 1.2-1.55    | 2          | 8.00       | 4.00          | 51.26        |
| CH <sub>3</sub> | 0.7-1       | 3          | 0.13       | 0.04          | 0.56         |
| <b>Total</b>    |             |            | 14.27      | 7.80          | 100.0        |

To calculate the conversion of the internal C=C, the % signal of H<sub>a</sub> was compared before and after ethenolysis. Conversion (X) was then calculated as

$$X = \frac{\%H_a \text{ before ethenolysis} - \%H_a \text{ after ethenolysis}}{\%H_a \text{ before ethenolysis}} \times 100\%$$

$$\text{In this case for Entry 1: } X = \frac{41.67 - 3.36}{41.67} \times 100\% = 92\%$$

$$\text{For Entry 12: } X = \frac{21.54 - 4.87}{21.54} \times 100\% = 77\%$$

The amount of vinyl groups after ethenolysis was calculated as %Signal of H<sub>b</sub>. For Entry 1 this is 25.83 or **26%** and for Entry 12, this is 12.82 or **13%**.

#### 4. Chromatogram of products detected under optimal non-isomerizing conditions

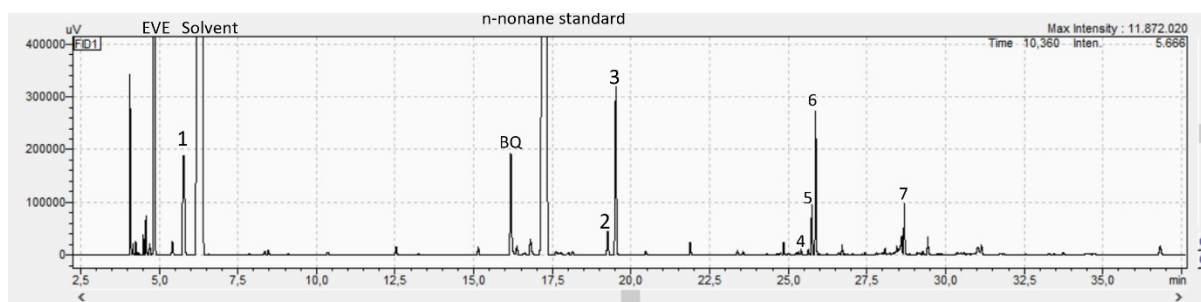

**Figure S6.** Chromatogram obtained for Entry 12, Table 1 as a representative product mixture with assignment for all peaks corresponding to >5% of the product selectivity. Identification based on GCMS,  $C_6$  and  $C_{10}$  reference  $\alpha,\omega$ -dienes and a  $C_6$ - $C_{30}$   $n$ -alkane standard mixture. Conditions: 0.1 mmol hPBD in 1 mL  $CDCl_3$ , 1 mol% Grubbs M220 catalyst, 2 mg BQ, 1h at  $100^\circ C$ , 8 bar  $C_2H_4$ . EVE: ethyl vinyl ether; Solvent:  $CDCl_3$ ; BQ: 1,4-benzoquinone; 1: 1,5-Hexadiene; 2: 1,5,9-Decatriene; 3: 1,9-Decadiene; 4: 1,5,9,13-Tetradecatetraene; 5: 1,5,13-Tetradecatriene; 6: 1,13-Tetradecadiene; 7: 1,17-Octadecadiene.

## 5. Product distributions isomerized fraction after ethenolysis

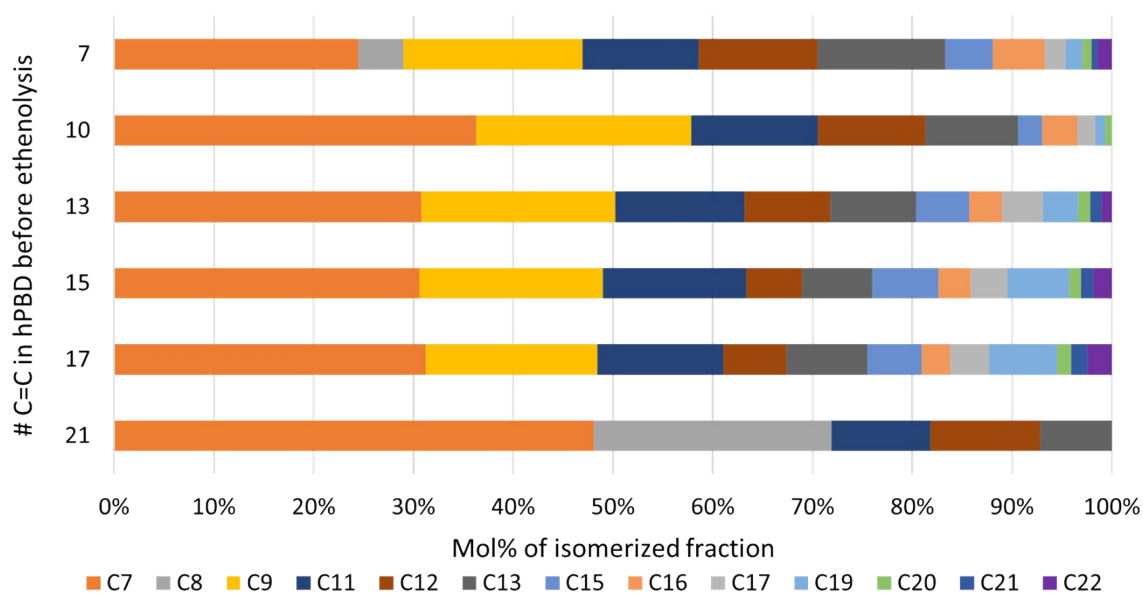

**Figure S7.** Product distributions of the isomerized fractions of entries 1-6 in Table 1. Conditions: 0.1 mmol hPBD in 1 mL  $\text{CDCl}_3$ , 1 mol% Grubbs M220 catalyst, 2 mg BQ, 1h at 100°C, 8 bar  $\text{C}_2\text{H}_4$ .

## 6. Large scale hydrogenation and ethenolysis

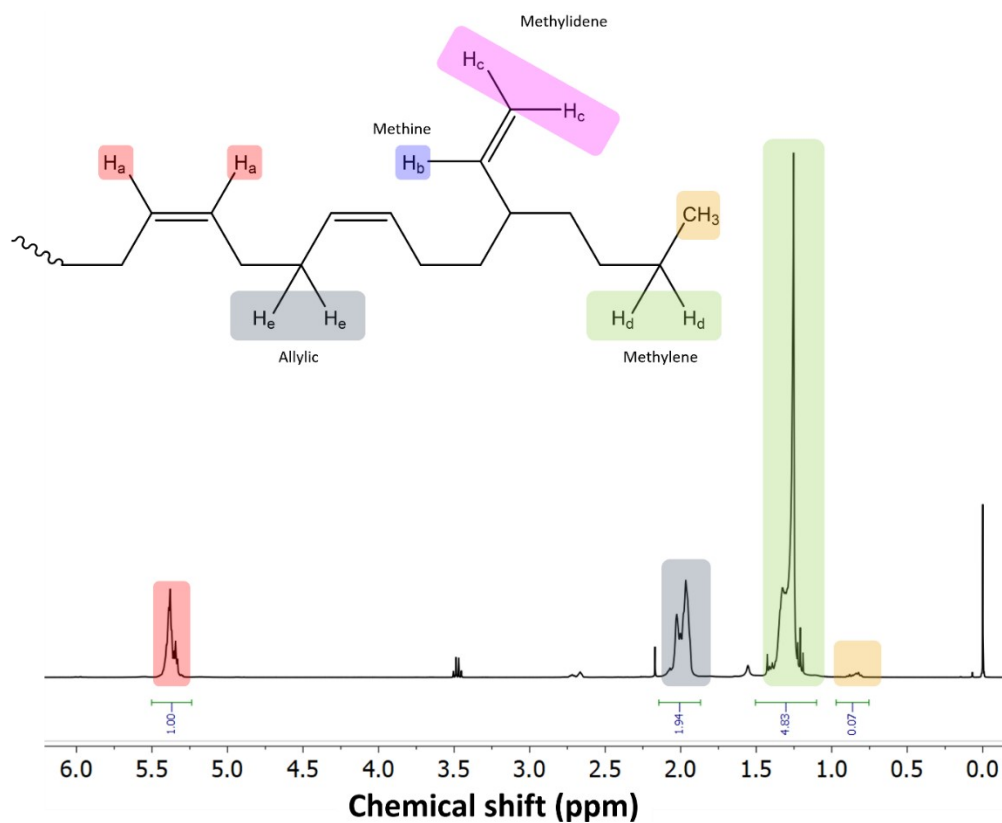

**Figure S8.**  $^1H$  NMR spectrum ( $CDCl_3$ ) of large scale hydrogenated HMW PBD with 11% C=C. Conditions: 16.2 g PBD in 232 mL CPME, 0.125 mol%  $Ru(PPh_3)_3Cl_2$  catalyst, 5h at 100°C, 14.5 bar  $H_2$ .

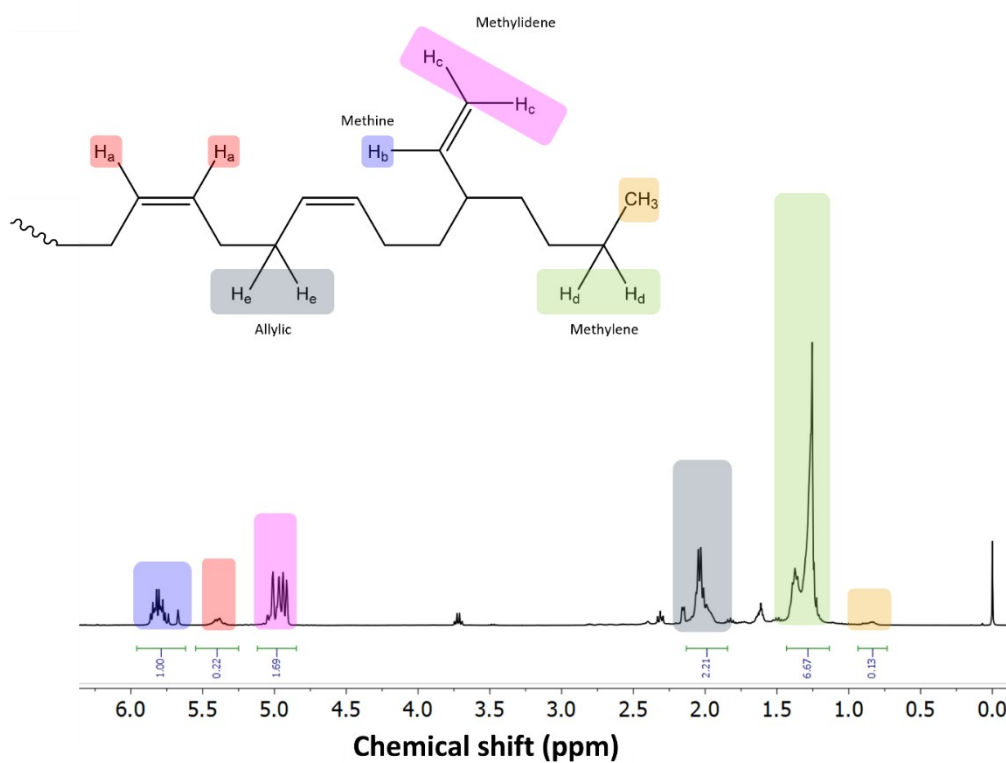

**Figure S9.**  $^1H$  NMR spectrum ( $CDCl_3$ ) of large scale ethenolysis of hPBD with 11% C=C. Conditions: 1.5 g PBD in 30 mL  $CDCl_3$ , 0.57 mol% Grubbs M202 catalyst, 4h at 80°C, 8 bar  $C_2H_4$ .

## 7. Mass recovery after hydrogenation



**Table S6.** Mass recovery after hydrogenation of HMW PBD in CPME. Conditions: 2.5 mL of 1.2M solution of PBD, 0.25 mol%  $Ru(PPh_3)_3Cl_2$ , 4h at 100°C.

| Entry | H <sub>2</sub> pressure (bar) | Product appearance after reaction | Initial mass (g) | Mass recovered (g) | % Recovery | %C=C  |
|-------|-------------------------------|-----------------------------------|------------------|--------------------|------------|-------|
| 1     | 6                             | liquid                            | 162              | 130.7              | 81         | 12.74 |
| 2     | 12                            | liquid                            | 162              | 120.7              | 75         | 7.40  |
| 3     | 20                            | solid                             | 162              | 145.4              | 90         | 6.10  |

## 8. One pot reaction

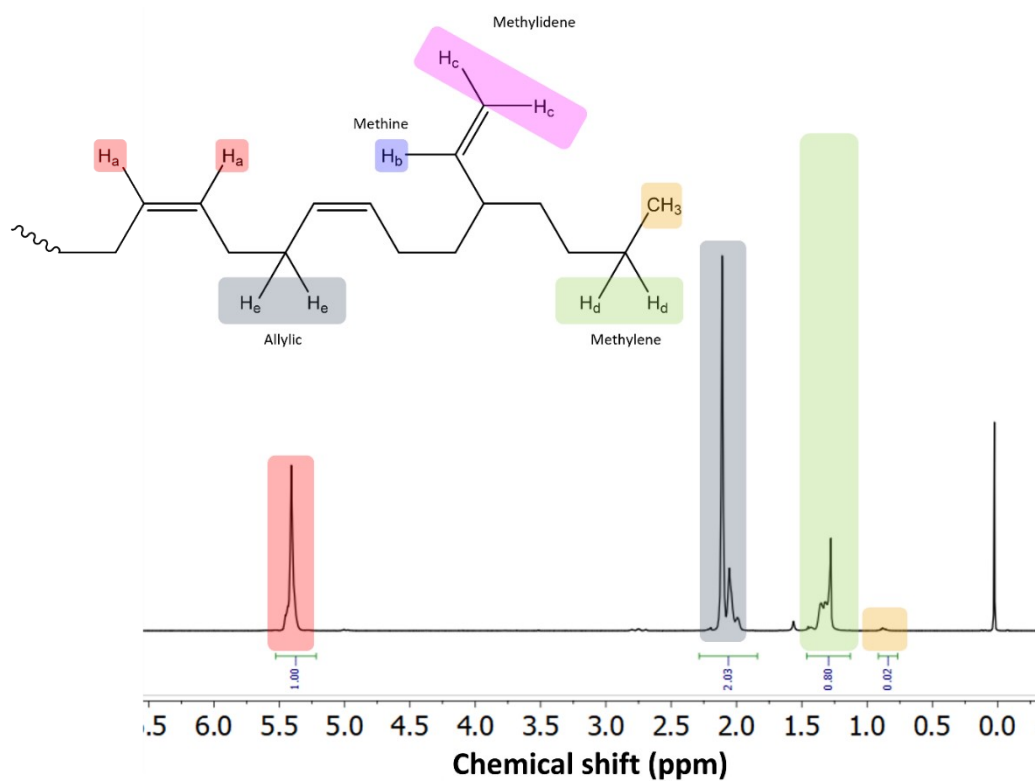

**Figure S10.**  $^1\text{H}$  NMR spectrum after hydrogenation in the one pot hydrogenation-ethenolysis. Conditions: 2 mL of a 1 M solution of PBD in  $\text{CDCl}_3$ , 0.125 mol%  $\text{Ru}(\text{PPh}_3)_3\text{Cl}_2$  catalyst, 9 h at  $40^\circ\text{C}$  under 30 bar  $\text{H}_2$ . The product contained 21% C=C.

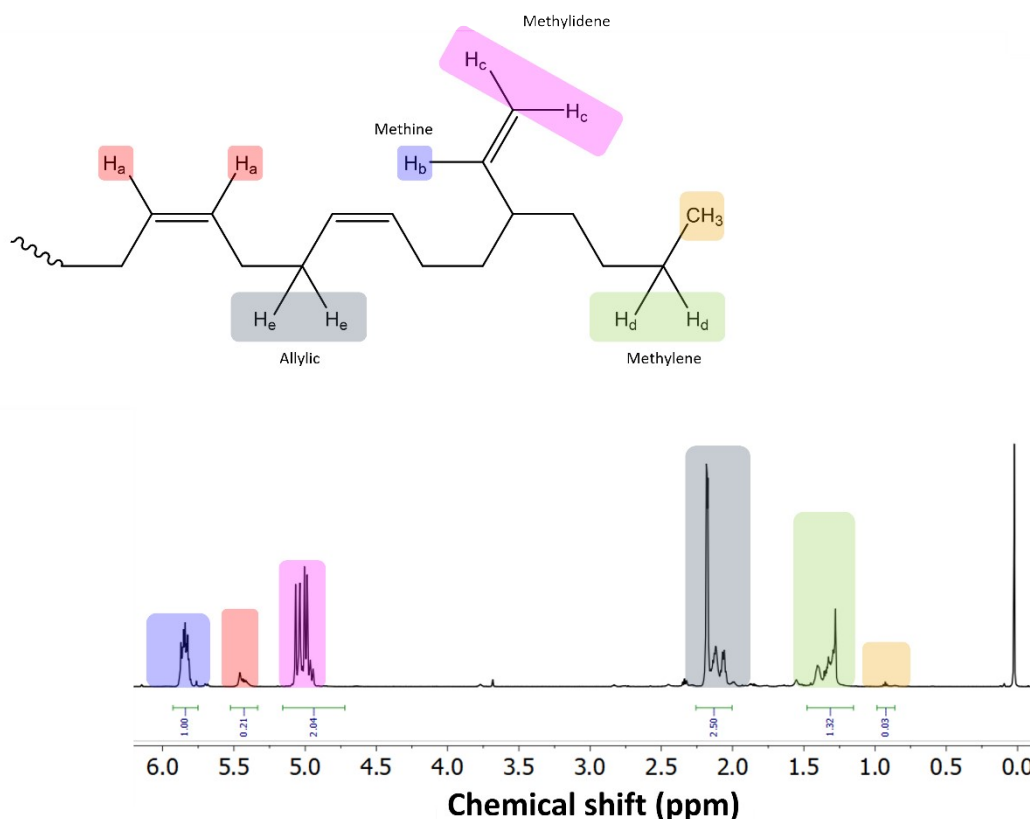

**Figure S11.**  $^1\text{H}$  NMR spectrum after ethenolysis in the one pot hydrogenation-ethenolysis. Reaction conditions: 0.1 mmol hPBD in 1 mL  $\text{CDCl}_3$ , 1 mol% Grubbs M220 catalyst, 2 mg BQ, 1 h at  $100^\circ\text{C}$ , 8 bar  $\text{C}_2\text{H}_4$ , 81% conversion after ethenolysis.

## 9. Partial hydrogenation and ethenolysis of the rubber phase of high impact PS

**Figure S12** depicts the  $^1\text{H}$  NMR spectra of the starting rubber phase of the HIPS<sup>2</sup>, the partially hydrogenated rubber phase and the spectrum after ethenolysis. It is clear that the amount of internal double bonds has decreased after the hydrogenation reaction and that ethenolysis creates terminal double bonds, indicating the formation of  $\alpha,\omega$ -dienes.

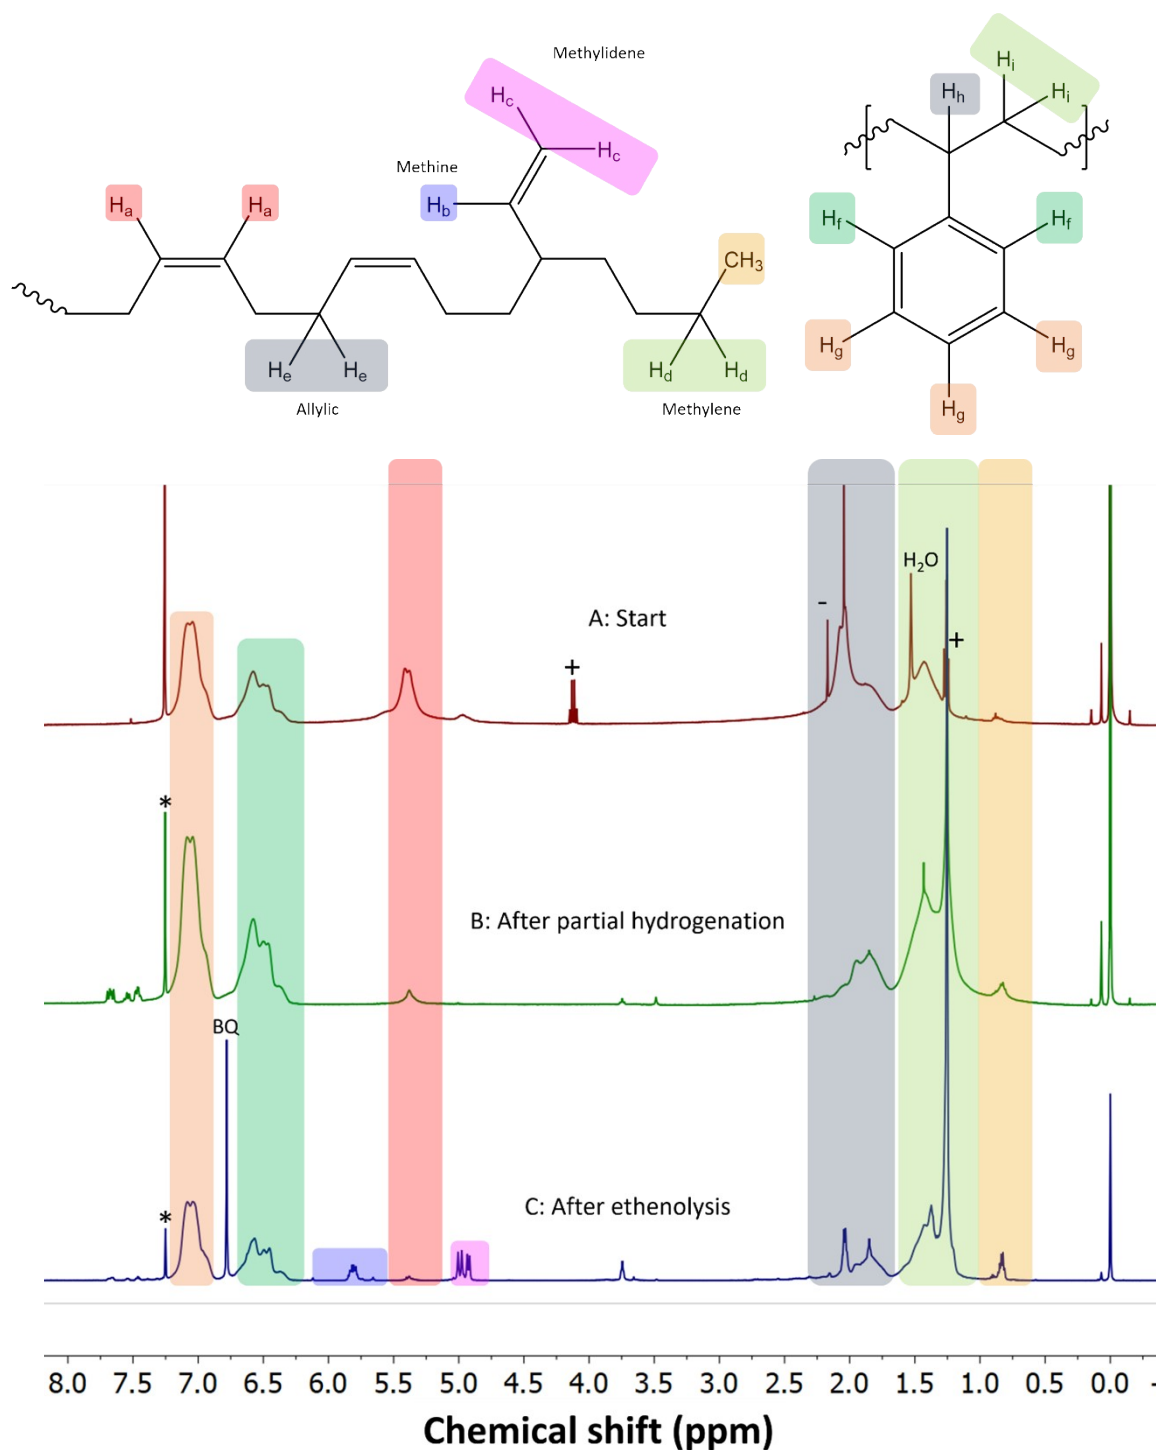

**Figure S12.**  $^1\text{H}$  NMR spectra of the rubber phase of HIPS at the start, after partial hydrogenation and after ethenolysis. \* $\text{CHCl}_3$ ,  $^+\text{EtOAc}$ ,  $^-\text{Acetone}$ . Conditions partial hydrogenation: 72 mg rubber phase of HIPS in 2 mL THF (0.5 mmol C=C), 12 bar  $\text{H}_2$ , 0.5 mol%  $\text{Ru}(\text{PPh}_3)_3\text{Cl}_2$  (4.8 mg), 2h; conditions ethenolysis: 30 mg hydrogenated HIPS rubber in 1 mL  $\text{CDCl}_3$ , 1 mg Grubbs M220, 2 mg BQ, 1h,  $100^\circ\text{C}$ , 8 bar  $\text{C}_2\text{H}_4$ .

## 10. Cross-metathesis

The expected products of CM of hPBD with DMM can also be made by CM of 1,5-hexadiene (C<sub>6</sub>), 1,9-decadiene (C<sub>10</sub>), 1,13-tetradecadiene (C<sub>14</sub>), ... To estimate the retention times of the products on GC and identify the signals in the <sup>1</sup>H NMR spectrum, CM with DMM using 1,5-hexadiene and 1,9-decadiene was performed.

### GC analysis

In **Figure S13A**, the GC chromatogram of a dummy mixture of the reagents 1,5-hexadiene, 1,7-octadiene, 1,9-decadiene and 1,11-dodecadiene is displayed. CM was performed only with 1,5-hexadiene (**Figure S13B**) and 1,9-decadiene (**Figure S13C**). It is clear that no substrate is left after reaction and 2 product peaks are detected which are hypothesised to be *cis/trans*-isomers. For the CM of hPBD (17% C=C), product peaks have comparable retention times as can be seen in **Figure S13D**.

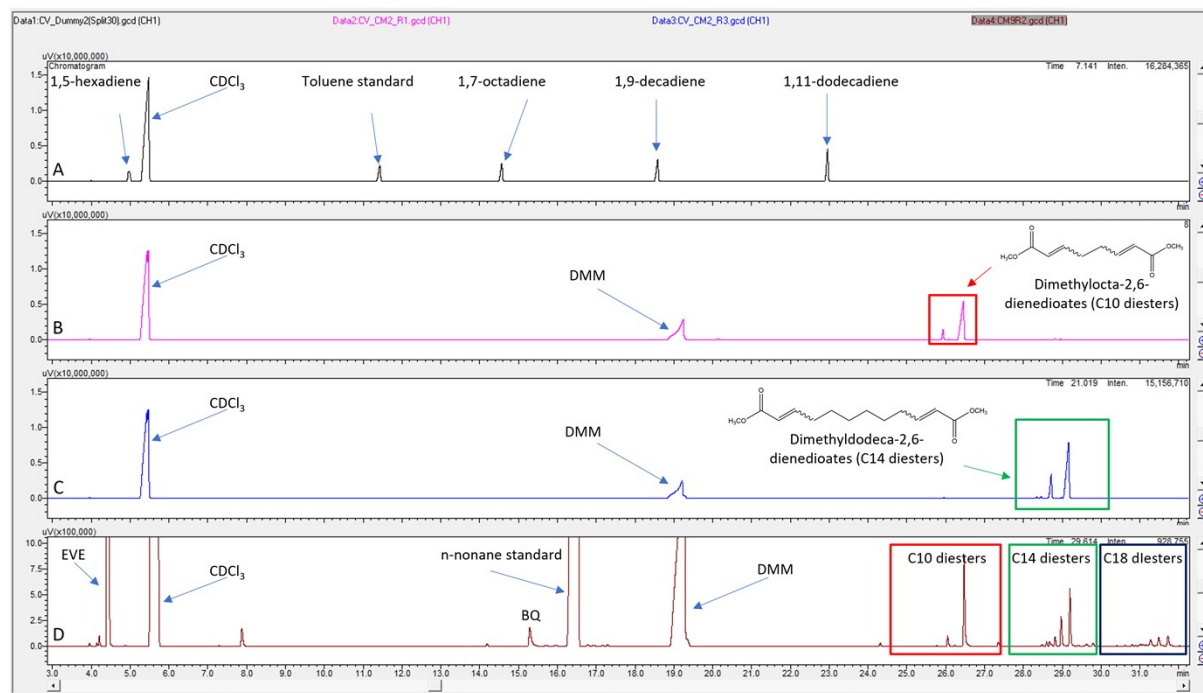

**Figure S13.** GC Chromatograms of dummy mixture of C<sub>6</sub>, C<sub>8</sub>, C<sub>10</sub> and C<sub>12</sub> dienes (A), CM of 1,5-hexadiene and DMM (B), CM of 1,9-decadiene and DMM (C) and after CM of hPBD with DMM (D). All chromatograms were shifted slightly to overlap the DMM peak.

### NMR analysis

The following **Table S8** gives an overview of the reported shifts and J coupling values.<sup>5</sup> These were compared to the peaks in the <sup>1</sup>H NMR spectra to identify which peaks in the overlap region at 5.8 ppm belong to the diester proton H<sub>a</sub> and which are from the MA. J(a,b) was determined to be 0.039 ppm based on the multiplet at 6.94 ppm. The insets in **Figure S14A** and **Figure S14B** show the assignments.

**Table S7.** Shifts and J coupling values of methyl acrylate (MA)

| Proton            | Shift (ppm) | J coupling values (Hz) |
|-------------------|-------------|------------------------|
| H <sub>e</sub>    | 6.4         | J(e,f) 17.4 Hz         |
| H <sub>f</sub>    | 6.12        | J(e,d) 1.4 Hz          |
| H <sub>d</sub>    | 5.82        | J(f,d) 10.5 Hz         |
| -OCH <sub>3</sub> | 3.76        |                        |

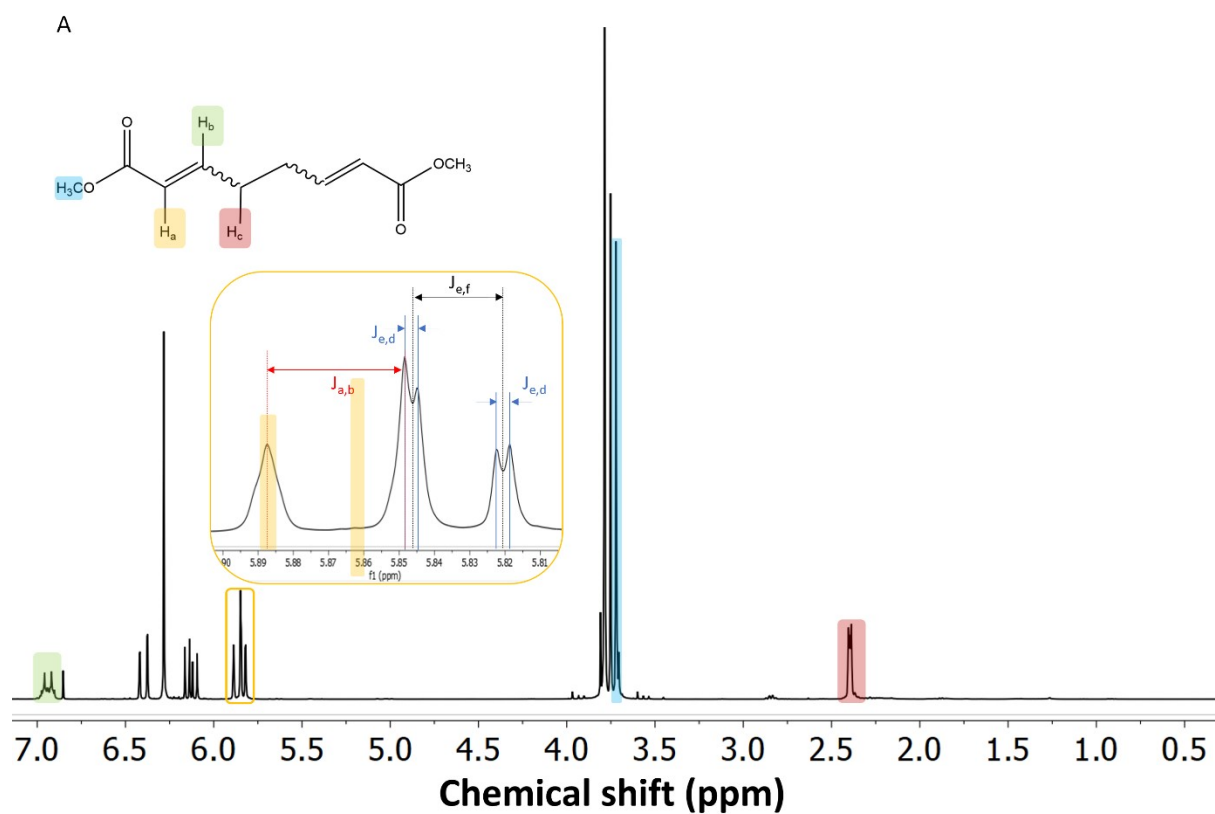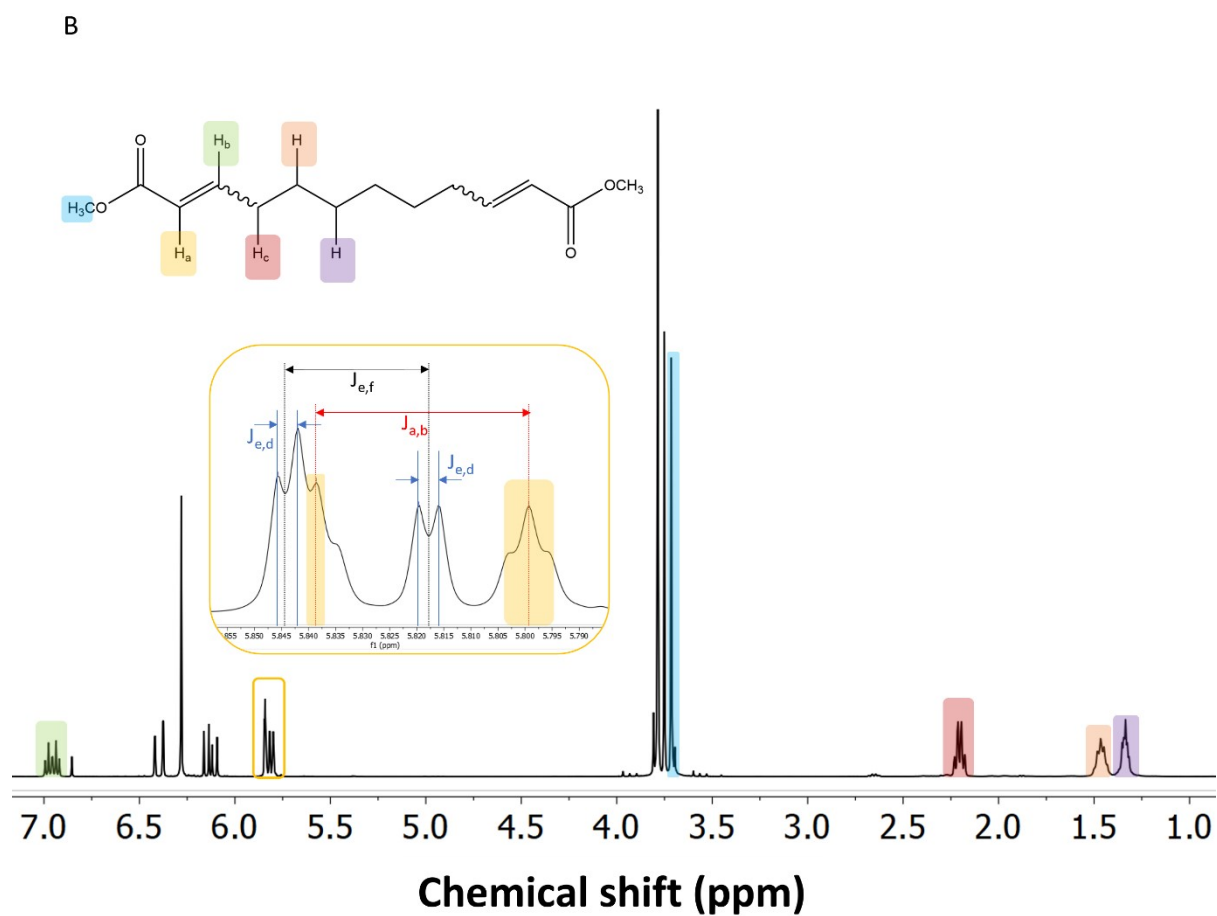

Figure S14.  $^1H$  NMR spectrum of CMM reaction of 1,5-hexadiene with DMM (A) and of 1,9-decadiene (B).

## References

- (1) Cuypers, T.; Morias, T.; Windels, S.; Marquez, C.; Van Goethem, C.; Vankelecom, I.; De Vos, D. E. Ni-Catalyzed Reductive Amination of Phenols with Ammonia or Amines into Cyclohexylamines. *Green Chemistry* **2020**, *22* (6), 1884–1893. <https://doi.org/10.1039/C9GC02625H>.
- (2) Giakoumakis, N. S.; Vos, C.; Janssens, K.; Vekeman, J.; Denayer, M.; De Proft, F.; Marquez, C.; De Vos, D. Total Revalorization of High Impact Polystyrene (HIPS): Enhancing Styrene Recovery and Upcycling of the Rubber Phase. *Green Chemistry* **2024**, *26* (1), 340–352. <https://doi.org/10.1039/D3GC02407E>.
- (3) *Polybutadiene, cis average Mw 200,000-300,000*. <https://www.sigmaaldrich.com/BE/en/product/aldrich/181374> (accessed 2023-11-13).
- (4) Makhyanov, N. Determination of Configurational Isomers in Polybutadienes by <sup>1</sup>H and <sup>13</sup>C NMR Spectroscopy. *Polymer Science Series A* **2012**, *54* (2), 69–80. <https://doi.org/10.1134/S0965545X12020071>.
- (5) *SDBS-1220*. <https://sdb.sdb.aist.go.jp/sdb/cgi-bin/landingpage?sdbno=1220> (accessed 2024-05-07).
